# Supplementary material for: Differential Epigenetic Regulation in Uninfected and Tuberculosis–Human Immunodeficiency Virus Co-Infected Patients
Source: MDPI journal article supplement (doi:10.3390/microorganisms12051001), 2024-05-16
Supplement: s1 [file s1]

**Supplementary Table S1. Primer sequences of candidate genes and *GAPDH* reference gene used for RT-qPCR**

| Primer name    | Orientation | Primer sequence            | PCR DNA fragment size |
|----------------|-------------|----------------------------|-----------------------|
| Human CIITA F  | Forward     | 5'-AGAAGTCCAAGGTTAGGGGC-3' | 164 bp                |
| Human CIITA R  | Reverse     | 5'-GGGTTGTCGTGGGAGTAAGA-3' |                       |
| Human HAT F    | Forward     | 5'-CCCGTGGTGACTGTTTTCT-3'  | 174 bp                |
| Human HAT R    | Reverse     | 5'-ATGCCCTTACCTCACACCTG-3' |                       |
| Human DNMT1 F  | Forward     | 5'-GTGGGGGACTGTGTCTCTGT-3' | 185 bp                |
| Human DNMT1 R  | Reverse     | 5'-AGGAGCACTCGTCCTTTCA-3'  |                       |
| Human SETDB2 F | Forward     | 5'-AAATGACTGGCTTGCCAAGG-3' | 202 bp                |
| Human SETDB2 R | Reverse     | 5'-TAACACACTGCTCGGGAAGT-3' |                       |
| Human KMT F    | Forward     | 5'-TCAACCTGCTCTCCTTCCAG-3' | 230 bp                |
| Human KMT R    | Reverse     | 5'-AAGGGAAGAACAGGGATGGG-3' |                       |
| Human GAPDH F  | Forward     | 5'-CCCTAGTCCCCAGAAACAGG-3' | 232 bp                |
| Human GAPDH R  | Reverse     | 5'-ATTCCTTCCCGGTTGCAAC-3'  |                       |

**Supplementary Table S2. Primer sequences of HIV *gag-pol* and *Mtb rpoB* genes used for conventional PCR**

| Primer name   | Orientation | Primer Sequence            | PCR DNA fragment size |
|---------------|-------------|----------------------------|-----------------------|
| HIV gag-pol F | Forward     | 5'-CCAGCGGCTACACTAGAAGA-3' | 110 bp                |
| HIV gag-pol R | Reverse     | 5'-CCTGCAATTCTGGCTGTGT-3'  |                       |
| Mtb rpoB F    | Forward     | 5'-GTCGACGAGTGCAAAGACAA-3' | 120 bp                |
| Mtb rpoB R    | Reverse     | 5'-TGGTCTCGTCGAAGTACACC-3' |                       |
